# Supplementary material for: Pre-Operative Evaluation of DNA Methylation Profile in Oral Squamous Cell Carcinoma Can Predict Tumor Aggressive Potential
Source: PubMed Central journal article supplement (PMC7555204; doi:10.3390/ijms21186691), 2020-09-14
Supplement: ijms-21-06691-s001.pdf [file ijms-21-06691-s001.pdf]

## Supplementary Materials

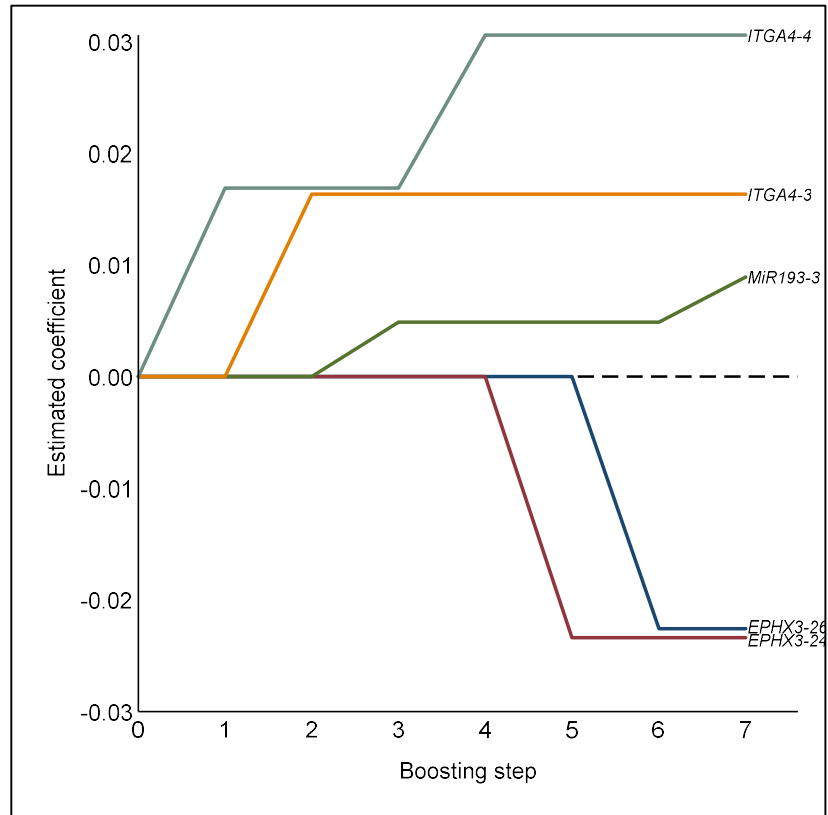

**Figure 1.** Coefficient paths of the five CpG sites included in the final Cox proportional hazards model. The coefficient estimates are plotted against the boosting steps as obtained from the likelihood-based component-wise algorithm. Coefficients are scaled to be at the level of the original methylation Beta-values.

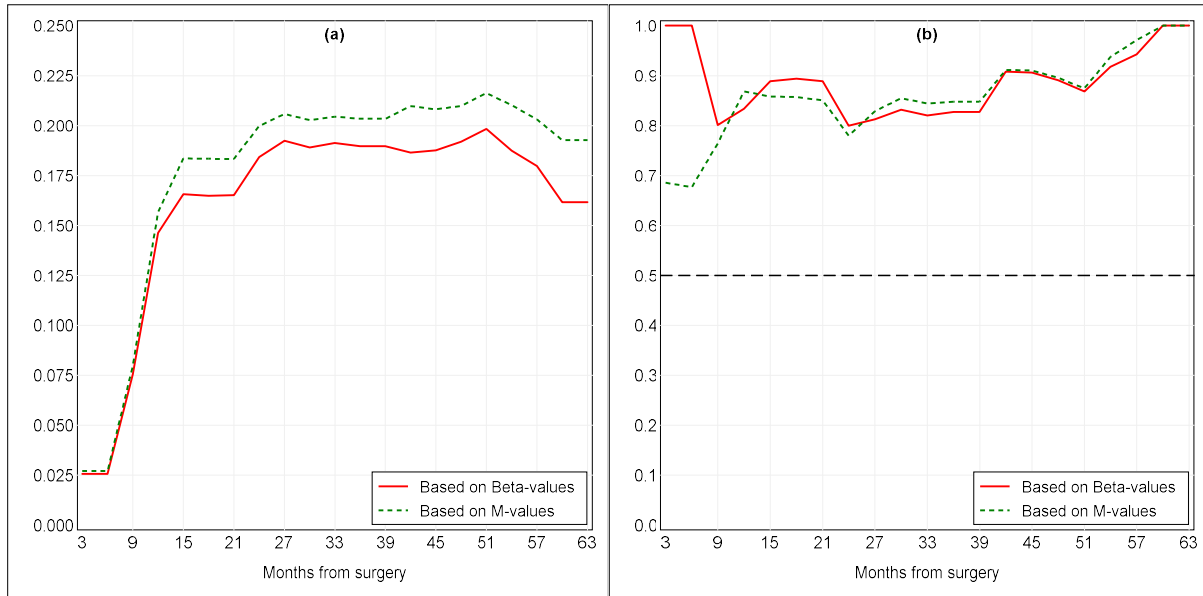

**Figure S2.** Time-dependent Brier score (a) and area under the receiver operator characteristic curve (AUC) (b) for the final Cox proportional hazards model fitted by component-wise likelihood-based boosting. The dashed line represents a non-discriminatory model (random guessing). M-values were computed as the binary logarithm of the intensities of methylated probes versus non-methylated probes. Performance and predictive accuracy of the model were estimated using the original training set of 36 patients.

**Table S1.** Permutation-based  $P$ -value estimations for all candidate methylation data (238 CpG sites). Covariates are ordered from smallest to largest  $P$ -value.

| CpG site         | $P$ -value | CpG site         | $P$ -value | CpG site           | $P$ -value |
|------------------|------------|------------------|------------|--------------------|------------|
| <i>ITGA4-4</i>   | 0.0027     | <i>PARP15-1</i>  | 0.4634     | <i>GP1BB-7</i>     | 0.7680     |
| <i>ITGA4-3</i>   | 0.0078     | <i>PARP15-15</i> | 0.4635     | <i>KIF1A-6</i>     | 0.7686     |
| <i>MiR193-3</i>  | 0.0099     | <i>EPHX3-29</i>  | 0.4638     | <i>KIF1A-20</i>    | 0.7732     |
| <i>EPHX3-24</i>  | 0.0157     | <i>MiR193-18</i> | 0.4720     | <i>MiR296-3</i>    | 0.7737     |
| <i>EPHX3-26</i>  | 0.0172     | <i>LRRTM1-10</i> | 0.4733     | <i>LINC0059-2</i>  | 0.7751     |
| <i>EPHX3-23</i>  | 0.0196     | <i>MiR296-7</i>  | 0.4804     | <i>LRRTM1-18</i>   | 0.7780     |
| <i>ITGA4-1</i>   | 0.0234     | <i>MiR193-22</i> | 0.4821     | <i>KIF1A-3</i>     | 0.7864     |
| <i>EPHX3-18</i>  | 0.0240     | <i>PARP15-19</i> | 0.4854     | <i>LINC0059-19</i> | 0.7889     |
| <i>EPHX3-20</i>  | 0.0268     | <i>ZAP70-9</i>   | 0.4887     | <i>MiR296-13</i>   | 0.7965     |
| <i>MiR296-10</i> | 0.0286     | <i>TERT-5</i>    | 0.5093     | <i>NTM-15</i>      | 0.8033     |
| <i>TERT-2</i>    | 0.0326     | <i>EPHX3-7</i>   | 0.5105     | <i>LRRTM1-16</i>   | 0.8086     |
| <i>ITGA4-2</i>   | 0.0350     | <i>GP1BB-3</i>   | 0.5157     | <i>KIF1A-14</i>    | 0.8093     |
| <i>ITGA4-5</i>   | 0.0404     | <i>NTM-4</i>     | 0.5166     | <i>LRRTM1-21</i>   | 0.8108     |
| <i>ITGA4-9</i>   | 0.0411     | <i>NTM-5</i>     | 0.5187     | <i>KIF1A-26</i>    | 0.8114     |
| <i>EPHX3-21</i>  | 0.0427     | <i>ZAP70-17</i>  | 0.5277     | <i>LINC0059-4</i>  | 0.8136     |
| <i>ITGA4-7</i>   | 0.0451     | <i>ZAP70-14</i>  | 0.5418     | <i>LRRTM1-8</i>    | 0.8177     |
| <i>EPHX3-12</i>  | 0.0455     | <i>GP1BB-17</i>  | 0.5450     | <i>PARP15-3</i>    | 0.8233     |
| <i>EPHX3-17</i>  | 0.0476     | <i>MiR296-15</i> | 0.5481     | <i>LRRTM1-1</i>    | 0.8245     |
| <i>EPHX3-16</i>  | 0.0495     | <i>LRRTM1-3</i>  | 0.5496     | <i>PARP15-17</i>   | 0.8251     |
| <i>ITGA4-6</i>   | 0.0511     | <i>NTM-14</i>    | 0.5572     | <i>KIF1A-22</i>    | 0.8268     |
| <i>TERT-1</i>    | 0.0555     | <i>ZAP70-15</i>  | 0.5578     | <i>MiR296-12</i>   | 0.8280     |
| <i>ITGA4-8</i>   | 0.0578     | <i>PARP15-9</i>  | 0.5698     | <i>LRRTM1-22</i>   | 0.8301     |
| <i>EPHX3-25</i>  | 0.0629     | <i>MiR193-25</i> | 0.5704     | <i>KIF1A-12</i>    | 0.8306     |
| <i>MiR296-14</i> | 0.0747     | <i>NTM-11</i>    | 0.5734     | <i>MiR193-8</i>    | 0.8331     |
| <i>EPHX3-4</i>   | 0.0766     | <i>NTM-3</i>     | 0.5735     | <i>LRRTM1-17</i>   | 0.8351     |
| <i>ITGA4-12</i>  | 0.0800     | <i>GP1BB-8</i>   | 0.5813     | <i>LRRTM1-19</i>   | 0.8377     |
| <i>MiR296-9</i>  | 0.0831     | <i>TERT-3</i>    | 0.5829     | <i>KIF1A-8</i>     | 0.8411     |
| <i>EPHX3-14</i>  | 0.0878     | <i>ZAP70-18</i>  | 0.5844     | <i>MiR193-4</i>    | 0.8419     |
| <i>ITGA4-11</i>  | 0.0888     | <i>ZAP70-8</i>   | 0.5846     | <i>MiR193-24</i>   | 0.8423     |
| <i>ITGA4-10</i>  | 0.0921     | <i>PARP15-5</i>  | 0.5849     | <i>LINC0059-7</i>  | 0.8429     |
| <i>EPHX3-22</i>  | 0.0947     | <i>GP1BB-12</i>  | 0.5884     | <i>MiR193-19</i>   | 0.8432     |
| <i>EPHX3-28</i>  | 0.1005     | <i>GP1BB-11</i>  | 0.5920     | <i>MiR193-5</i>    | 0.8452     |
| <i>EPHX3-2</i>   | 0.1084     | <i>MiR296-6</i>  | 0.5962     | <i>LINC0059-15</i> | 0.8499     |
| <i>ITGA4-14</i>  | 0.1151     | <i>ZAP70-11</i>  | 0.5963     | <i>KIF1A-23</i>    | 0.8525     |
| <i>EPHX3-5</i>   | 0.1257     | <i>LRRTM1-2</i>  | 0.6014     | <i>TERT-4</i>      | 0.8543     |
| <i>GP1BB-18</i>  | 0.1270     | <i>ZAP70-12</i>  | 0.6058     | <i>MiR193-11</i>   | 0.8573     |
| <i>EPHX3-10</i>  | 0.1311     | <i>PARP15-13</i> | 0.6058     | <i>LINC0059-13</i> | 0.8635     |
| <i>ITGA4-13</i>  | 0.1439     | <i>LRRTM1-11</i> | 0.6077     | <i>KIF1A-25</i>    | 0.8646     |
| <i>EPHX3-15</i>  | 0.1526     | <i>NTM-12</i>    | 0.6098     | <i>LRRTM1-4</i>    | 0.8683     |
| <i>EPHX3-13</i>  | 0.1570     | <i>NTM-10</i>    | 0.6101     | <i>LINC0059-3</i>  | 0.8739     |
| <i>FLI1-4</i>    | 0.1646     | <i>GP1BB-13</i>  | 0.6184     | <i>KIF1A-27</i>    | 0.8751     |
| <i>EPHX3-8</i>   | 0.1838     | <i>NTM-1</i>     | 0.6185     | <i>MiR193-14</i>   | 0.8755     |
| <i>EPHX3-11</i>  | 0.1859     | <i>MiR296-1</i>  | 0.6238     | <i>MiR193-17</i>   | 0.8756     |
| <i>EPHX3-3</i>   | 0.1942     | <i>PARP15-6</i>  | 0.6246     | <i>LINC0059-6</i>  | 0.8822     |
| <i>ZAP70-3</i>   | 0.2019     | <i>PARP15-10</i> | 0.6255     | <i>KIF1A-1</i>     | 0.8872     |
| <i>MiR296-8</i>  | 0.2043     | <i>GP1BB-4</i>   | 0.6269     | <i>LINC0059-16</i> | 0.8888     |
| <i>FLI1-5</i>    | 0.2044     | <i>MiR193-23</i> | 0.6295     | <i>MiR193-21</i>   | 0.8938     |
| <i>ZAP70-1</i>   | 0.2079     | <i>LRRTM1-13</i> | 0.6313     | <i>LINC0059-14</i> | 0.8938     |
| <i>GP1BB-15</i>  | 0.2102     | <i>NTM-9</i>     | 0.6337     | <i>LRRTM1-20</i>   | 0.8959     |
| <i>EPHX3-6</i>   | 0.2151     | <i>GP1BB-5</i>   | 0.6341     | <i>TERT-6</i>      | 0.8997     |
| <i>FLI1-8</i>    | 0.2152     | <i>MiR193-20</i> | 0.6383     | <i>PARP15-12</i>   | 0.9038     |

|                  |        |                    |        |                    |        |
|------------------|--------|--------------------|--------|--------------------|--------|
| <i>EPHX3-1</i>   | 0.2245 | <i>NTM-13</i>      | 0.6433 | <i>MiR193-12</i>   | 0.9053 |
| <i>EPHX3-19</i>  | 0.2249 | <i>MiR193-26</i>   | 0.6471 | <i>LRRTM1-9</i>    | 0.9065 |
| <i>MiR193-1</i>  | 0.2291 | <i>GP1BB-9</i>     | 0.6609 | <i>PARP15-4</i>    | 0.9077 |
| <i>MiR193-2</i>  | 0.2408 | <i>GP1BB-10</i>    | 0.6669 | <i>KIF1A-19</i>    | 0.9104 |
| <i>ZAP70-4</i>   | 0.2448 | <i>MiR296-4</i>    | 0.6688 | <i>KIF1A-11</i>    | 0.9121 |
| <i>ZAP70-20</i>  | 0.2449 | <i>NTM-7</i>       | 0.6735 | <i>LINC0059-9</i>  | 0.9164 |
| <i>GP1BB-1</i>   | 0.2457 | <i>GP1BB-6</i>     | 0.6745 | <i>KIF1A-18</i>    | 0.9180 |
| <i>FLI1-2</i>    | 0.2493 | <i>LRRTM1-5</i>    | 0.6773 | <i>LRRTM1-15</i>   | 0.9207 |
| <i>ZAP70-7</i>   | 0.2696 | <i>MiR193-16</i>   | 0.6790 | <i>LINC0059-17</i> | 0.9239 |
| <i>ZAP70-5</i>   | 0.2987 | <i>LINC0059-5</i>  | 0.6813 | <i>LRRTM1-14</i>   | 0.9253 |
| <i>MiR296-5</i>  | 0.3060 | <i>PARP15-18</i>   | 0.6904 | <i>LINC0059-8</i>  | 0.9267 |
| <i>EPHX3-9</i>   | 0.3064 | <i>ZAP70-10</i>    | 0.6918 | <i>MiR296-2</i>    | 0.9290 |
| <i>PARP15-8</i>  | 0.3078 | <i>LRRTM1-6</i>    | 0.7063 | <i>LINC0059-11</i> | 0.9304 |
| <i>FLI1-3</i>    | 0.3314 | <i>LINC0059-18</i> | 0.7180 | <i>ZAP70-13</i>    | 0.9321 |
| <i>ZAP70-2</i>   | 0.3380 | <i>MiR193-9</i>    | 0.7213 | <i>LINC0059-12</i> | 0.9366 |
| <i>ZAP70-19</i>  | 0.3542 | <i>KIF1A-16</i>    | 0.7251 | <i>MiR193-6</i>    | 0.9426 |
| <i>MiR193-7</i>  | 0.3586 | <i>KIF1A-5</i>     | 0.7267 | <i>LINC0059-10</i> | 0.9448 |
| <i>FLI1-1</i>    | 0.3613 | <i>MiR193-15</i>   | 0.7278 | <i>KIF1A-15</i>    | 0.9475 |
| <i>EPHX3-27</i>  | 0.3950 | <i>LRRTM1-12</i>   | 0.7339 | <i>PARP15-7</i>    | 0.9476 |
| <i>FLI1-7</i>    | 0.4166 | <i>MiR193-13</i>   | 0.7360 | <i>KIF1A-17</i>    | 0.9559 |
| <i>PARP15-2</i>  | 0.4192 | <i>LINC0059-1</i>  | 0.7434 | <i>LRRTM1-7</i>    | 0.9565 |
| <i>GP1BB-2</i>   | 0.4205 | <i>KIF1A-2</i>     | 0.7456 | <i>KIF1A-4</i>     | 0.9586 |
| <i>ZAP70-16</i>  | 0.4322 | <i>PARP15-16</i>   | 0.7515 | <i>KIF1A-10</i>    | 0.9608 |
| <i>NTM-6</i>     | 0.4449 | <i>PARP15-14</i>   | 0.7570 | <i>KIF1A-24</i>    | 0.9674 |
| <i>ZAP70-6</i>   | 0.4470 | <i>GP1BB-16</i>    | 0.7573 | <i>KIF1A-21</i>    | 0.9674 |
| <i>NTM-2</i>     | 0.4508 | <i>KIF1A-9</i>     | 0.7578 | <i>KIF1A-13</i>    | 0.9689 |
| <i>GP1BB-14</i>  | 0.4545 | <i>NTM-8</i>       | 0.7583 | <i>KIF1A-7</i>     | 0.9760 |
| <i>MiR296-11</i> | 0.4580 | <i>PARP15-11</i>   | 0.7603 |                    |        |
| <i>MiR193-10</i> | 0.4625 | <i>LINC0059-20</i> | 0.7622 |                    |        |

---

**Table S2.** Cox proportional hazards model resulting from likelihood-based component-wise boosting with no information on connection among same-gene CpG sites (optimal number of steps = 10), and after conversion of Beta-values into M-values (optimal number of steps = 4). Non-zero regression coefficients (ln HR) are presented along with hazard ratios (HRs) and permutation-based *P*-values. Coefficients are scaled to be at the level of the original methylation data.

| CpG site                      | Beta-values, no pathway connection information |        | M-values* |        |
|-------------------------------|------------------------------------------------|--------|-----------|--------|
|                               | Ln HR                                          | HR     | Ln HR     | HR     |
| <i>EPHX3-18</i>               | .                                              | .      | -0.3940   | 0.6744 |
| <i>EPHX3-23</i>               | -0.0195                                        | 0.9807 | .         | .      |
| <i>EPHX3-24</i>               | -0.0235                                        | 0.9768 | .         | .      |
| <i>EPHX3-25</i>               | .                                              | .      | -0.4256   | 0.6534 |
| <i>ITGA4-4</i>                | 0.0577                                         | 1.0594 | 0.1884    | 1.2073 |
| <i>MiR193-3</i>               | 0.0176                                         | 1.0178 | 0.2192    | 1.2451 |
| <i>Integrated Brier score</i> |                                                | 0.089  |           | 0.070  |
| <i>C-index</i>                |                                                | 0.805  |           | 0.806  |
| <i>Integrated AUC</i>         |                                                | 0.847  |           | 0.834  |

\* Pathway connection information had no impact on variable selection.
